# Supplementary material
Source: PubMed Central journal article supplement (PMC2821530)

# Supplementary Figure S2

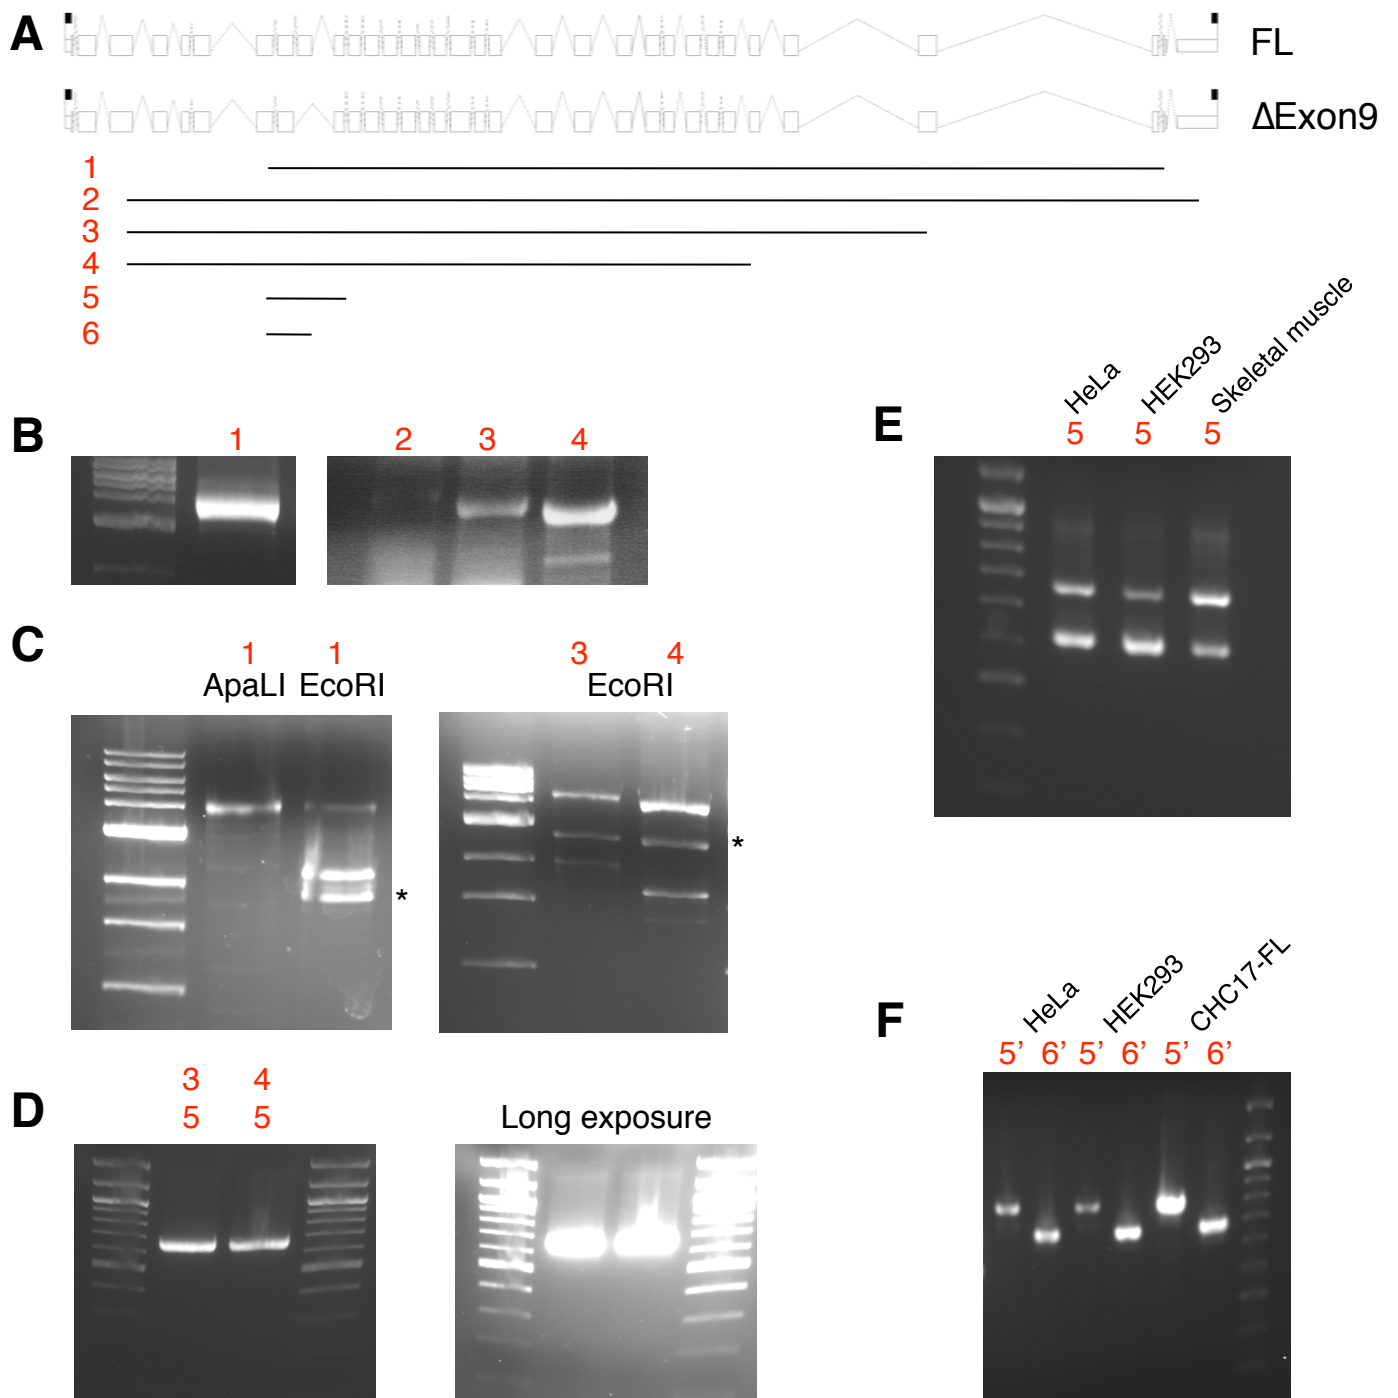

Supplement: NIHMS28754-supplement-Supp_Fig_2.pdf [file NIHMS28754-supplement-Supp_Fig_2.pdf]
